# Supplementary material
Source: Springer Nature journal article supplement (https://www.springermedizin.de/resource/supplementary/12902_2013_243_MOESM3_ESM.pdf/9515848)

Women - type 1

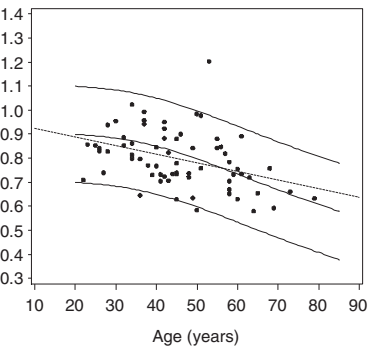

Men - type 1

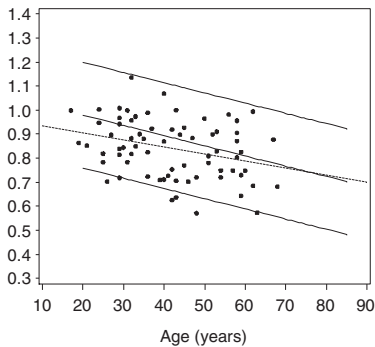

Women - type 2

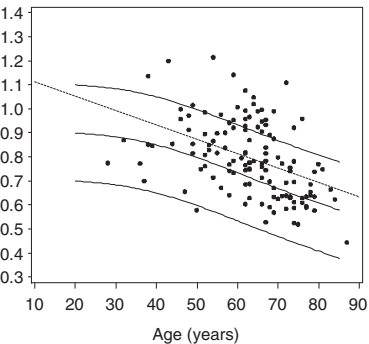

Men - type 2

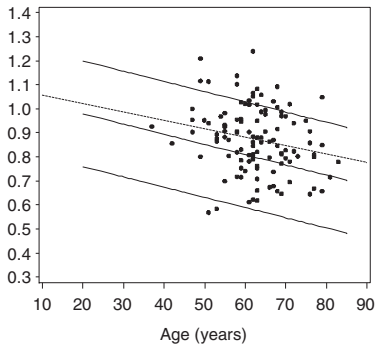

Supplement: MOESM3 [file 9515848]
